# Supplementary material for: Mental Health and Health-Related Quality of Life of Children and Youth during the First Year of the COVID-19 Pandemic: Results from a Cross-Sectional Survey in Saskatchewan, Canada
Source: MDPI journal article supplement (doi:10.3390/children10061009), 2023-06-03
Supplement: s1 [file s1]

### Supplemental file

**Table S1:** Bivariate Analysis of Anxiety, Depression, and Quality of Life in Children 8-18 Years During the First Year of the Pandemic in Saskatchewan, Canada.

| Covariates             | Anxiety       |                          | Depression    |                          | Quality of Life  |                            |
|------------------------|---------------|--------------------------|---------------|--------------------------|------------------|----------------------------|
|                        | Low<br>(0-64) | Medium<br>-High<br>(>65) | Low<br>(0-64) | Medium<br>-High<br>(>65) | High<br>(71-100) | Low-<br>Moderate<br>(0-70) |
| Age                    |               |                          |               |                          |                  |                            |
|                        | n=467         |                          | n=467         |                          | n=502            |                            |
| 8-11 years             | 208(92.0)     | 18(8.0)                  | 210 (92.9)    | 16(7.1)                  | 138(59.2)        | 95(40.8)                   |
| 12-15 years            | 136(86.1)     | 22(13.9)                 | 136(86.1)     | 22(13.9)                 | 95(55.6)         | 76(44.4)                   |
| 16-18 years            | 76(91.6)      | 7(8.4)                   | 78(94.0)      | 5(6.0)                   | 22(22.4)         | 76(77.6)                   |
| p-value                | 0.139         |                          | 0.040         |                          | <0.001           |                            |
| Grade                  |               |                          |               |                          |                  |                            |
|                        | n=467         |                          | n=467         |                          | n=490            |                            |
| Elementary (1-8)       | 287(90.8)     | 29(9.2)                  | 289(91.5)     | 27(8.5)                  | 203(61.7)        | 126(38.3)                  |
| High (9-12)            | 132(87.4)     | 19(12.6)                 | 135(89.4)     | 16(10.6)                 | 48(29.8)         | 113(70.2)                  |
| p-value                | 0.257         |                          | 0.473         |                          | <0.001           |                            |
| Gender                 |               |                          |               |                          |                  |                            |
|                        | n=467         |                          | n=467         |                          | n=477            |                            |
| Girl/Woman             | 190(88.4)     | 25(11.6)                 | 193(89.9)     | 22(10.2)                 | 111(50.5)        | 109(49.5)                  |
| Boy/Man                | 229(90.9)     | 23(9.1)                  | 231(91.7)     | 21(8.3)                  | 135(52.5)        | 122(47.5)                  |
| p-value                | 0.375         |                          | 0.479         |                          | 0.651            |                            |
| Income                 |               |                          |               |                          |                  |                            |
|                        | n=466         |                          | n=467         |                          | n=504            |                            |
| <\$100,000             | 146(87.4)     | 21(12.6)                 | 149(89.2)     | 18(10.8)                 | 101(55.5)        | 81(44.5)                   |
| ³\$100,000             | 180(96.8)     | 6(3.2)                   | 180(96.8)     | 6(3.2)                   | 106(52.7)        | 95(47.3)                   |
| Missing                | 93(82.3)      | 20(17.7)                 | 95(83.3)      | 19(16.7)                 | 49(40.5)         | 72(59.5)                   |
| p-value                | <0.001        |                          | <0.001        |                          | 0.030            |                            |
| Ethnicity              |               |                          |               |                          |                  |                            |
|                        | n=421         |                          | n=421         |                          | n=451            |                            |
| Ethnocultural minority | 104(89.7)     | 12(10.3)                 | 105(90.5)     | 11(9.5)                  | 76(63.3)         | 44(36.7)                   |
| White                  | 276(90.5)     | 29(9.5)                  | 280(91.8)     | 25(8.2)                  | 162(48.9)        | 169(51.1)                  |
| p-value                | 0.796         |                          | 0.673         |                          | 0.007            |                            |
| Place of residence     |               |                          |               |                          |                  |                            |
|                        | n=415         |                          | n=415         |                          | n=443            |                            |

Paper: Mental Health and Health-Related Quality of Life of Children and Youth during the First Year of the COVID-19 Pandemic: Results from a Cross-Sectional Survey in Saskatchewan, Canada

|                    |              |          |              |          |           |          |
|--------------------|--------------|----------|--------------|----------|-----------|----------|
| Mid-size city/town | 150(94.3)    | 9(5.7)   | 150(94.3)    | 9(5.7)   | 85(52.1)  | 78(47.9) |
| Rural              | 67(88.2)     | 9(11.8)  | 71(93.4)     | 5(6.6)   | 44(53.0)  | 39(47.0) |
| Regina/Saskatoon   | 154(85.6)    | 26(14.4) | 157(87.2)    | 23(12.8) | 103(52.3) | 94(47.7) |
| p-value            | <b>0.030</b> |          | <b>0.053</b> |          | 0.991     |          |

| Household density    |              |          |                  |          |              |           |
|----------------------|--------------|----------|------------------|----------|--------------|-----------|
|                      | n=467        |          | n=467            |          | n=503        |           |
| £1<br>person/bedroom | 192(85.7)    | 32(14.3) | 192(85.7)        | 32(14.3) | 118(47.8)    | 129(52.2) |
| >1<br>person/bedroom | 227(93.4)    | 16(6.6)  | 232(95.5)        | 11(4.5)  | 138(53.9)    | 118(46.1) |
| p-value              | <b>0.006</b> |          | <b>&lt;0.001</b> |          | <b>0.169</b> |           |

| Schooling situation (Mode of learning) |              |          |              |          |                  |           |
|----------------------------------------|--------------|----------|--------------|----------|------------------|-----------|
|                                        | n=438        |          | n=437        |          | n=471            |           |
| Either in-class or online              | 209(94.1)    | 13(5.9)  | 211(95.5)    | 10(4.5)  | 146(60.8)        | 94(39.2)  |
| Both                                   | 189(87.5)    | 27(12.5) | 189(87.5)    | 27(12.5) | 81(35.1)         | 150(64.9) |
| p-value                                | <b>0.016</b> |          | <b>0.003</b> |          | <b>&lt;0.001</b> |           |

Household conflicts

|                             |           |          |           |          |           |           |
|-----------------------------|-----------|----------|-----------|----------|-----------|-----------|
|                             | n=467     |          | n=467     |          | n=503     |           |
| Lot/somewhat more           | 95(78.5)  | 26(21.5) | 94(77.7)  | 27(22.3) | 38(29.0)  | 93(71.0)  |
| No real change              | 191(95.0) | 10(5.0)  | 192(95.5) | 9(4.5)   | 131(61.5) | 82(38.5)  |
| Lot/somewhat less           | 29(96.7)  | 1(3.3)   | 29(96.7)  | 1(3.3)   | 21(70.0)  | 9(30.0)   |
| Varied                      | 105(91.3) | 10(8.7)  | 109(94.8) | 6(5.2)   | 66(51.2)  | 63(48.8)  |
| p-value                     | <0.001    |          | <0.001    |          | <0.001    |           |
| Sleep                       |           |          |           |          |           |           |
|                             | n=442     |          | n=443     |          | n=477     |           |
| <8 hours                    | 86(89.6)  | 10(10.4) | 83(86.5)  | 13(13.5) | 52(46.8)  | 59(53.2)  |
| ≥8 hours                    | 318(91.9) | 28(8.1)  | 323(93.1) | 24(6.9)  | 193(52.7) | 173(47.3) |
| p-value                     | 0.472     |          | 0.038     |          | 0.277     |           |
| Physical activity           |           |          |           |          |           |           |
|                             | n=467     |          | n=466     |          | n=501     |           |
| 7 days/week MVPA            | 72(88.9)  | 9(11.1)  | 75(92.6)  | 6(7.4)   | 56(60.9)  | 36(39.1)  |
| <7 days/week MVPA           | 347(89.9) | 39(10.1) | 348(90.4) | 37(9.6)  | 199(48.7) | 210(51.3) |
| p-value                     | 0.786     |          | 0.533     |          | 0.034     |           |
| Change in physical activity |           |          |           |          |           |           |
|                             | n=466     |          | n=465     |          | n=502     |           |
| Lot/little less active      | 281(91.5) | 26(8.5)  | 283(92.5) | 23(7.5)  | 154(47.1) | 173(52.9) |
| About the same              | 72(93.5)  | 5(6.5)   | 74(96.1)  | 3(3.9)   | 54(63.5)  | 31(36.5)  |
| Little/lot more active      | 65(79.3)  | 17(20.7) | 66(80.5)  | 16(19.5) | 47(52.2)  | 43(47.8)  |
| p-value                     | 0.003     |          | <0.001    |          | 0.025     |           |
| Screen time                 |           |          |           |          |           |           |
|                             | n=408     |          | n=408     |          | n=443     |           |
| <3 hours                    | 144(95.4) | 7(4.6)   | 148(98.0) | 3(2.0)   | 107(66.5) | 54(33.5)  |
| ≥3 hours                    | 226(87.9) | 31(12.1) | 225(87.5) | 32(12.5) | 118(42.1) | 162(57.9) |
| p-value                     | 0.013     |          | <0.001    |          | <0.001    |           |

**Table S2:** Full Regression Model for Factors Associated with Medium-High Anxiety.

|                   | Medium-high Anxiety |         |
|-------------------|---------------------|---------|
|                   | OR (95%CI)          | p-value |
| Main effects      |                     |         |
| Age group (years) |                     |         |

|                                        |                     |                  |
|----------------------------------------|---------------------|------------------|
| 8-11                                   | 4.54 (1.33-15.47)   | <b>0.016</b>     |
| 16-18                                  | 1.17 (0.28-4.89)    | 0.833            |
| 12-15                                  | Reference           |                  |
| Gender                                 |                     |                  |
| Girl/Woman                             | 2.07 (0.74-5.81)    | 0.165            |
| Boy/Man                                | Reference           |                  |
| Income                                 |                     |                  |
| <\$100,000                             | 1.20 (0.37-3.93)    | 0.765            |
| Missing                                | 13.50 (4.13-44.15)  | <b>&lt;0.001</b> |
| ≥\$100,000                             | Reference           |                  |
| Ethnicity                              |                     |                  |
| Ethnocultural minority                 | 43.25 (4.18-447.81) | <b>0.002</b>     |
| White                                  | Reference           |                  |
| Place of residence                     |                     |                  |
| Rural                                  | 8.44 (2.04-34.89)   | <b>0.003</b>     |
| Regina/Saskatoon                       | 4.07 (1.07-15.46)   | <b>0.039</b>     |
| Mid-size city/towns                    | Reference           |                  |
| Household density                      |                     |                  |
| >1 person/bedroom                      | 0.13 (0.04-0.42)    | <b>0.001</b>     |
| £1 person/bedroom                      | Reference           |                  |
| Mental health before COVID             |                     |                  |
| Very good/good                         | 6.18 (1.11-34.36)   | <b>0.038</b>     |
| Fair/poor                              | 18.49 (2.69-127.03) | <b>0.003</b>     |
| Excellent                              | Reference           |                  |
| Schooling situation (Mode of learning) |                     |                  |
| Either in-class or online              | 1.19 (0.48-2.92)    | 0.712            |
| Both                                   | Reference           |                  |
| Screen time                            |                     |                  |
| ≥3 hours                               | 3.07 (1.16-8.12)    | <b>0.023</b>     |
| <3 hours                               | Reference           |                  |
| Interactions                           |                     |                  |
| Age X Ethnicity                        |                     |                  |
| 8-11 years X Ethnocultural minority    | 0.04 (0.003-0.51)   | <b>0.013</b>     |
| 16-18 years X Ethnocultural minority   | 0.04 (0.003-0.57)   | <b>0.017</b>     |
| Gender X Ethnicity                     |                     |                  |

|                                     |                   |              |
|-------------------------------------|-------------------|--------------|
| Girl/Woman X Ethnocultural minority | 0.03 (0.003-0.26) | <b>0.002</b> |
|-------------------------------------|-------------------|--------------|

*Note:* Odds Ratio. Parsimonious model shown in table; adjusted for age, gender, income, ethnicity, parental immigration status, place of residence, household density, mental health before COVID, schooling situation, COVID cases in classroom, household tension/conflict, change in physical activity and screen time, age X ethnicity, gender X ethnicity, income X ethnicity, age X parental immigration status, gender X parental immigration status, and income X parental immigration status. Model fit statistics:

AIC=135.557, BIC=200.142

**Table S3:** Full Regression Model for Factors Associated with Medium-High Depression.

|                        | Medium-high Depression |                |
|------------------------|------------------------|----------------|
|                        | OR (95%CI)             | <i>p-value</i> |
| Main effects           |                        |                |
| Age group (years)      |                        |                |
| 8-11                   | 3.48 (1.03-11.76)      | <b>0.044</b>   |
| 16-18                  | 0.19 (0.04-0.89)       | <b>0.034</b>   |
| 12-15                  | Reference              |                |
| Gender                 |                        |                |
| Girl/Woman             | 1.61 (0.52-4.98)       | 0.408          |
| Boy/Man                | Reference              |                |
| Income                 |                        |                |
| <\$100,000             | 1.07 (0.34-3.30)       | 0.912          |
| Missing                | 2.25 (0.52 -9.66)      | 0.276          |
| ≥\$100,000             | Reference              |                |
| Ethnicity              |                        |                |
| Ethnocultural minority | 0.89 (0.22-3.56)       | 0.869          |
| White                  | Reference              |                |
| Place of residence     |                        |                |
| Rural                  | 6.60 (1.01-43.17)      | <b>0.049</b>   |
| Regina/Saskatoon       | 6.18 (1.45-26.29)      | <b>0.014</b>   |
| Mid-size city/towns    | Reference              |                |
| Household density      |                        |                |

Paper: Mental Health and Health-Related Quality of Life of Children and Youth during the First Year of the COVID-19 Pandemic: Results from a Cross-Sectional Survey in Saskatchewan, Canada  
 Nazeem Muhajarine et al. Children 2023, 10, 1009. <https://doi.org/10.3390/children10061009>

|                            |                    |                  |
|----------------------------|--------------------|------------------|
| >1 person/bedroom          | 0.06 (0.01-0.24)   | <b>&lt;0.001</b> |
| £1 person/bedroom          | Reference          |                  |
| Mental health before COVID |                    |                  |
| Very good/good             | 0.69 (0.16-2.89)   | 0.609            |
| Fair/poor                  | 3.94 (0.68-22.84)  | 0.126            |
| Excellent                  | Reference          |                  |
| Household conflicts        |                    |                  |
| Lot/somewhat more          | 10.84 (2.28-51.51) | <b>0.003</b>     |
| Lot/somewhat less          | 3.15 (0.35-27.97)  | 0.304            |
| Varied                     | 5.58 (1-31.23)     | 0.051            |
| No real change             | Reference          |                  |
| Sleep                      |                    |                  |
| ≥8 hours                   | 0.07 (0.02-0.26)   | <b>&lt;0.001</b> |
| <8 hours                   | Reference          |                  |
| Screen time                |                    |                  |
| ≥3 hours                   | 5.2 (1.52-17.79)   | <b>0.009</b>     |
| <3 hours                   | Reference          |                  |

*Note:* Odds Ratio. Parsimonious model shown in table; adjusted for age, gender, income, ethnicity, parental immigration status, place of residence, household density, mental health before COVID, schooling situation, COVID cases in classroom, household tension/conflict, sleep, change in physical activity and screen time, age X ethnicity, gender X ethnicity, income X ethnicity, age X parental immigration status, gender X parental immigration status, and income X parental immigration status. Model fit statistics: AIC=111.963, BIC=176.183

**Table S4:** Full Regression Model for Factors Associated with Low-Moderate Quality of Life.

|                   | Low-moderate Quality of Life |                |
|-------------------|------------------------------|----------------|
|                   | OR (95%CI)                   | <i>p-value</i> |
| Main effects      |                              |                |
| Age group (years) |                              |                |
| 8-11              | 0.89 (0.36-2.21)             | 0.808          |
| 16-18             | 5.88 (1.66-20.86)            | <b>0.006</b>   |

|                                        |                   |              |
|----------------------------------------|-------------------|--------------|
| 12-15                                  | Reference         |              |
| Gender                                 |                   |              |
| Girl/Woman                             | 1.37(0.69-2.74)   | 0.37         |
| Boy/Man                                | Reference         |              |
| Income                                 |                   |              |
| <\$100,000                             | 0.82 (0.30-2.38)  | 0.707        |
| Missing                                | 2.77 (0.75-10.24) | 0.127        |
| ≥\$100,000                             | Reference         |              |
| Ethnicity                              |                   |              |
| Ethnocultural minority                 | 0.89 (0.18-4.32)  | 0.883        |
| White                                  | Reference         |              |
| Place of residence                     |                   |              |
| Rural                                  | 0.78 (0.25-2.39)  | 0.659        |
| Regina/Saskatoon                       | 0.56 (0.25-1.26)  | 0.161        |
| Mid-size city/towns                    | Reference         |              |
| Parental immigration status            |                   |              |
| None/Either one born in Canada         | 0.29 (0.74-1.13)  | 0.075        |
| Both born in Canada                    | Reference         |              |
| Mental health before COVID             |                   |              |
| Very good/good                         | 3.25 (1.56-6.79)  | <b>0.002</b> |
| Fair/poor                              | 2.51 (0.70-9)     | 0.157        |
| Excellent                              | Reference         |              |
| Schooling situation (Mode of learning) |                   |              |
| Either in-class or online              | 0.43 (0.165-1.10) | 0.078        |
| Both                                   | Reference         |              |
| COVID cases in classroom               |                   |              |
| Yes                                    | 1.01 (0.41-2.47)  | 0.987        |
| Missing                                | 2.85 (1.20-6.78)  | <b>0.018</b> |
| No                                     | Reference         |              |
| Household conflicts                    |                   |              |
| Lot/somewhat more                      | 3.38 (1.46-7.85)  | <b>0.005</b> |
| Lot/somewhat less                      | 0.43 (0.13-1.46)  | 0.178        |
| Varied                                 | 1.29 (0.50-3.35)  | 0.598        |
| No real change                         | Reference         |              |
| Sleep                                  |                   |              |
| ≥8 hours                               | 0.79 (0.31-2.06)  | 0.635        |

|                                              |                    |              |
|----------------------------------------------|--------------------|--------------|
| < 8 hours                                    | Reference          |              |
| Change in physical activity                  |                    |              |
| Lot/little less active                       | 3.83 (1.46-10.04)  | <b>0.006</b> |
| Little/lot more active                       | 2.01 (0.62-6.50)   | 0.241        |
| About the same                               | Reference          |              |
| Screen time                                  |                    |              |
| ≥3 hours                                     | 2.70 (1.11-6.58)   | <b>0.029</b> |
| <3 hours                                     | Reference          |              |
| Interactions                                 |                    |              |
| Age X Ethnicity                              |                    |              |
| 8-11 years X Ethnocultural minority          | 0.59 (0.008-0.42)  | <b>0.005</b> |
| 16-18 years X Ethnocultural minority         | 1.08 (0.15-7.98)   | 0.943        |
| Income X Ethnicity                           |                    |              |
| <\$100,000 X Ethnocultural minority          | 8.30 (1.18-58.55)  | <b>0.034</b> |
| Missing X Ethnocultural minority             | 2.44 (0.23-25.90)  | 0.459        |
| Age X Parental immigration status            |                    |              |
| 8-11 years X None/Either one born in Canada  | 10.55 (1.35-82.22) | <b>0.025</b> |
| 16-18 years X None/Either one born in Canada | 0.60 (0.61-5.97)   | 0.666        |

*Note:* Odds Ratio. Parsimonious model shown in table; adjusted for age, gender, income, ethnicity, parental immigration status, place of residence, household density, mental health before COVID, schooling situation, COVID cases in classroom, household tension/conflict, sleep, physical activity, change in physical activity and screen time, age X ethnicity, gender X ethnicity, income X ethnicity, age X parental immigration status, gender X parental immigration status, and income X parental immigration status.

Model fit statistics: AIC=330.841, BIC=436.441



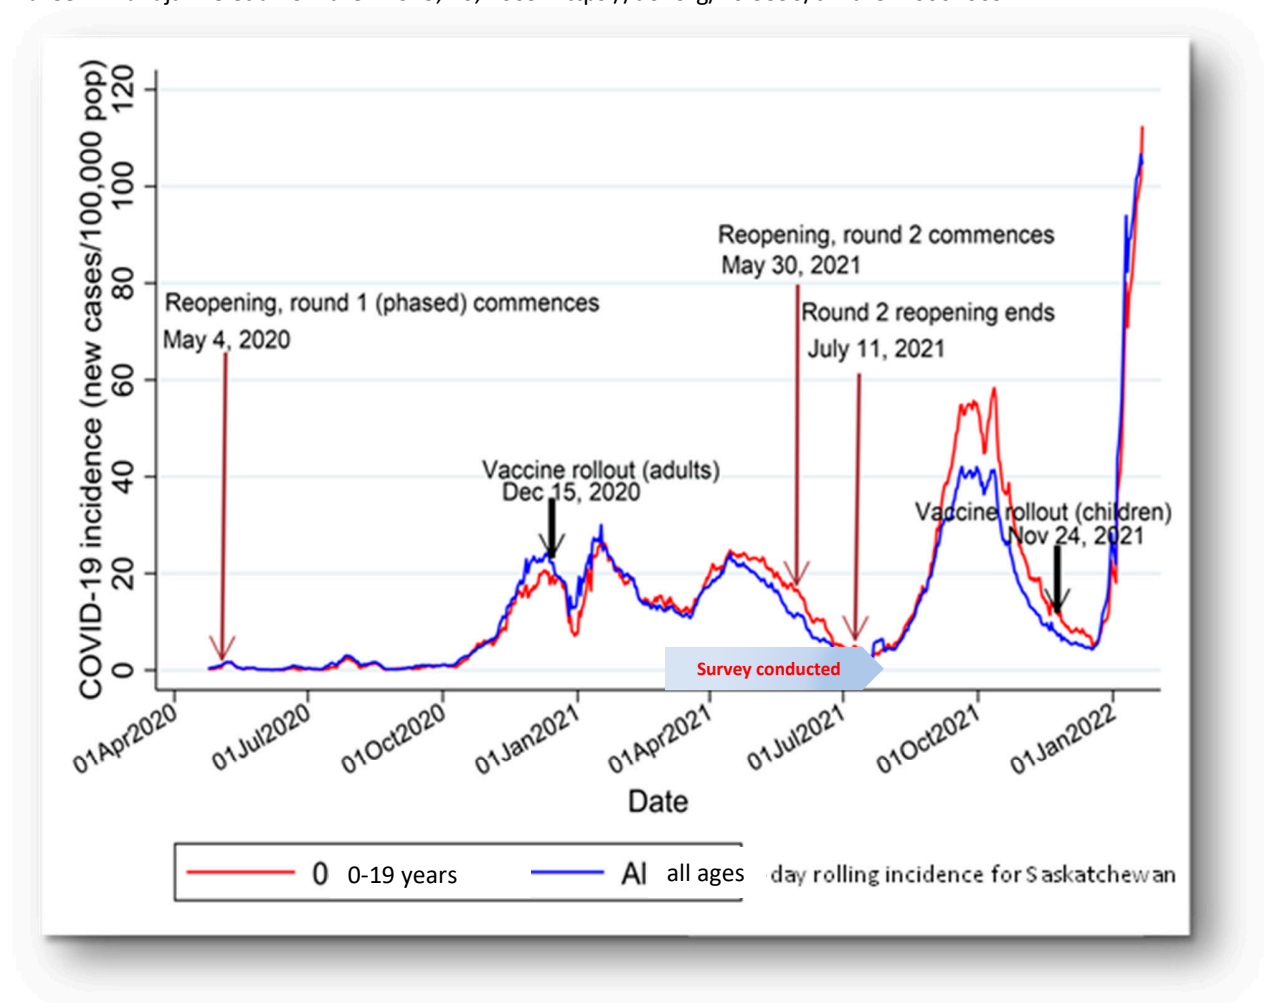

**Figure S1:** Incidence of COVID-19 in Saskatchewan, Canada.

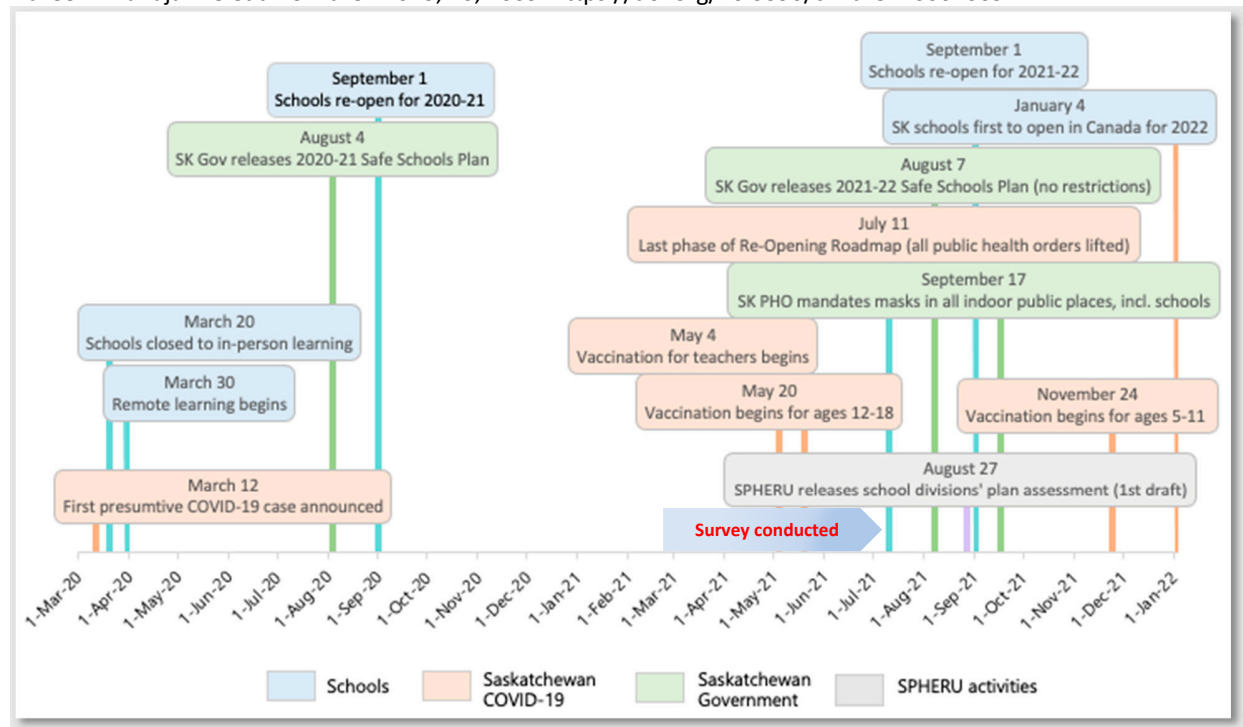

**Figure S2:** Timeline of COVID-19 and Elementary and Secondary Schools in Saskatchewan, Canada.
